# Supplementary material for: A Generative Neural Network for Maximizing Fitness and Diversity of Synthetic DNA and Protein Sequences
Source: PubMed Central journal article supplement — Cell Syst. Author manuscript; Available in PMC 2021 Dec 22. (PMC8694568; doi:10.1016/j.cels.2020.05.007), 2020-06-25
Supplement: NIHMS1597373-supplement-6.pdf [file NIHMS1597373-supplement-6.pdf]

# Supplemental Item Inventory

**For the paper “A generative neural network for maximizing fitness and diversity of synthetic DNA and protein sequences”.**

Figure S1 - Diversity cost illustrations.

Figure S2 - Additional details for the APA isoform design task.

Figure S3 - Additional benchmark comparisons.

Figure S4 - Additional details for the 3' Cleavage design task.

Figure S5 - Additional analysis of the KL-bounded DEN.

Figure S6 - Additional details for the differential splicing design task.

Figure S7 - The inverse regression DEN model.

Table S1 - Primer sequences for the APA qPCR assay.

Table S2 - APARENT predictor architecture.

Table S3 - VAE decoder architecture.

Table S4 - VAE decoder ResBlock architecture.

Table S5 - VAE encoder architecture.

Table S6 - VAE encoder ResBlock architecture.

Table S7 - DEN generator architecture.

Table S8 - Inverse regression DEN architecture.

Table S9 - Class-conditional DEN architecture.

Table S10 - Protein Design DEN generator architecture.

Table S11 - Splicing CNN predictor architecture.

Table S12 - Splicing hexamer regression predictor architecture.

Movie S1 - Training progression for the APA isoform design task (random seeds).

Movie S2 - Training progression for the APA isoform design task (fixed seeds).

Movie S3 - Training progression for the 3' cleavage design task (random seeds).

Movie S4 - Training progression for the 3' cleavage design task (fixed seeds).
